# Supplementary material
Source: publisher figshare collection journal article supplement (https://tandf.figshare.com/ndownloader/files/35118274)
Supplement: Supplementary file 1 [file 35118274]

**Supplementary file 3- Demographics and clinical information on patients diagnosed with Vestibular Schwannoma**

| **Percent occurrence** | Percent of total attendees of Retrocochlear Clinic  Percent of those referred for MRI through Retrocochlear Clinic | 0.5%  1.1% |
| --- | --- | --- |
| **Gender** | Male  Female | N= 3  N= 1 |
| **Age bracket** | 50-65  66-80  80+ | N= 1  N= 2  N=1 |
| **Primary referral reason** | Asymmetrical hearing loss  Unilateral tinnitus | N= 3  N= 1 |
| **Reason for MRI** | Met asymmetry criteria  Met asymmetry criteria and had unilateral tinnitus | N= 3  N= 1 |
| **Size (Maximum length)** | Median= 11.4mm  Range= 8mm-17mm |  |
